# Supplementary material for: Extracellular Vesicle-Mediated Transfer of Genetic Information between the Hematopoietic System and the Brain in Response to Inflammation
Source: PubMed Central journal article supplement (PMC4043485; doi:10.1371/journal.pbio.1001874), 2014-06-03
Supplement: pbio.1001874.s007.pdf [file pbio.1001874.s007.pdf]

**Table S3 miRNAs Cp<36 in LCM Purkinje neurons**

**Non-recombined Purkinje neurons**

| #397            | Cp    | #304            | Cp    |
|-----------------|-------|-----------------|-------|
| mmu-miR-669b    | 30,09 | mmu-miR-124     | 29,13 |
| mmu-miR-30c     | 31,46 | mmu-miR-9       | 29,64 |
| mmu-miR-9       | 31,77 | mmu-miR-30c     | 29,69 |
| mmu-miR-124     | 31,83 | mmu-miR-26a     | 30,12 |
| mmu-miR-26a     | 32,15 | mmu-miR-125b-5p | 30,15 |
| mmu-miR-883b-5p | 32,22 | mmu-miR-125a-5p | 31,05 |
| mmu-miR-125a-5p | 32,79 | mmu-miR-30b     | 31,12 |
| mmu-miR-30b     | 32,88 | mmu-miR-669b    | 31,2  |
| mmu-miR-125b-5p | 32,91 | mmu-miR-138     | 31,76 |
| mmu-miR-434-3p  | 33,82 | mmu-miR-434-3p  | 32,02 |
| mmu-let-7b      | 34,1  | mmu-let-7b      | 32,19 |
| mmu-miR-126-3p  | 34,28 | mmu-miR-126-3p  | 32,32 |
| mmu-miR-328     | 34,45 | mmu-miR-204     | 32,62 |
| mmu-miR-99b     | 34,46 | mmu-miR-328     | 32,75 |
| mmu-miR-204     | 34,73 | mmu-miR-99b     | 33    |
| mmu-miR-181a    | 34,78 | mmu-miR-195     | 33,37 |
| mmu-miR-127     | 34,87 | mmu-miR-181a    | 33,55 |
| mmu-miR-320     | 34,96 | mmu-miR-27b     | 33,65 |
| mmu-miR-342-3p  | 35,17 | mmu-miR-24      | 33,65 |
| mmu-miR-195     | 35,27 | mmu-miR-342-3p  | 33,74 |
| rho-miR-340-3p  | 35,5  | mmu-miR-127     | 33,9  |
| mmu-miR-24      | 35,53 | mmu-miR-708     | 33,92 |
| mmu-miR-760-3p  | 35,53 | mmu-miR-320     | 33,94 |
| mmu-miR-27a     | 35,63 | mmu-miR-27a     | 34,09 |
| mmu-miR-138     | 35,69 | mmu-let-7c      | 34,1  |
| mmu-miR-206     | 35,71 | mmu-let-7g      | 34,34 |
| mmu-miR-27b     | 35,85 | mmu-miR-760-3p  | 34,43 |
| mmu-let-7c      | 35,93 | mmu-miR-23a     | 34,57 |
|                 |       | mmu-let-7i      | 34,58 |
|                 |       | mmu-miR-30a     | 34,67 |
|                 |       | mmu-miR-154     | 34,72 |
|                 |       | mmu-miR-206     | 34,74 |
|                 |       | mmu-miR-21      | 34,75 |
|                 |       | mmu-miR-30d     | 34,79 |
|                 |       | mmu-miR-29a     | 34,79 |
|                 |       | mmu-miR-434-5p  | 34,88 |
|                 |       | mmu-miR-92b     | 34,96 |
|                 |       | mmu-miR-9*      | 34,97 |
|                 |       | mmu-miR-101a    | 34,99 |
|                 |       | mmu-miR-301a    | 35,06 |
|                 |       | mmu-miR-218     | 35,18 |
|                 |       | mmu-miR-99a     | 35,26 |
|                 |       | mmu-miR-101b    | 35,3  |
|                 |       | rho-miR-290     | 35,46 |
|                 |       | mmu-let-7e      | 35,48 |
|                 |       | mmu-miR-29c     | 35,53 |
|                 |       | mmu-miR-297b-3p | 35,53 |
|                 |       | mmu-miR-30e     | 35,6  |
|                 |       | mmu-miR-324-5p  | 35,64 |
|                 |       | mmu-miR-149     | 35,64 |
|                 |       | mmu-miR-411     | 35,72 |
|                 |       | mmu-let-7a      | 35,75 |
|                 |       | mmu-miR-133b    | 35,83 |

**Recombined Purkinje neurons**

| #397            | Cp    | #304            | Cp    |
|-----------------|-------|-----------------|-------|
| mmu-miR-582-3p  | 30,62 | mmu-miR-669b    | 27,72 |
| mmu-miR-26a     | 31,70 | mmu-miR-124     | 30,19 |
| mmu-miR-30c     | 31,78 | mmu-miR-30c     | 30,20 |
| mmu-miR-345-3p  | 32,00 | mmu-miR-26a     | 30,30 |
| mmu-miR-124     | 32,41 | mmu-miR-9       | 30,58 |
| mmu-miR-30b     | 32,46 | mmu-miR-883b-5p | 31,19 |
| mmu-miR-351     | 32,52 | mmu-miR-125b-5p | 31,70 |
| mmu-miR-16      | 32,63 | mmu-miR-30b     | 31,93 |
| mmu-miR-9       | 32,75 | mmu-miR-125a-5p | 32,13 |
| mmu-miR-125a-5p | 33,19 | mmu-let-7b      | 32,52 |
| mmu-miR-126-3p  | 33,26 | mmu-miR-126-3p  | 32,67 |
| mmu-let-7b      | 33,31 | mmu-miR-582-5p  | 32,82 |
| mmu-miR-434-3p  | 33,51 | mmu-miR-204     | 32,89 |
| mmu-miR-204     | 33,54 | mmu-miR-434-3p  | 33,08 |
| mmu-miR-883b-5p | 34,24 | mmu-miR-138     | 33,43 |
| mmu-miR-99b     | 34,51 | mmu-miR-16      | 33,60 |
| mmu-miR-490-3p  | 34,52 | mmu-miR-328     | 33,65 |
| mmu-miR-23b     | 34,82 | mmu-miR-342-3p  | 34,04 |
| mmu-miR-196a-2* | 34,89 | mmu-miR-297a    | 34,06 |
| mmu-miR-574-3p  | 34,95 | mmu-miR-27a     | 34,12 |
| mmu-miR-138     | 35,04 | mmu-miR-668     | 34,23 |
| mmu-miR-190     | 35,05 | mmu-miR-27b     | 34,27 |
| mmu-miR-297c    | 35,08 | mmu-miR-574-3p  | 34,33 |
| mmu-miR-320     | 35,18 | mmu-miR-223     | 34,49 |
| mmu-miR-328     | 35,23 | mmu-miR-127     | 34,52 |
| mmu-miR-125b-5p | 35,30 | mmu-miR-134     | 34,55 |
| mmu-miR-24      | 35,35 | mmu-miR-669a-5p | 34,72 |
| mmu-miR-132     | 35,36 | mmu-miR-758     | 34,87 |
| mmu-miR-342-3p  | 35,36 | mmu-miR-29a     | 34,97 |
| mmu-miR-27b     | 35,39 | mmu-let-7q      | 35,01 |
| mmu-miR-212-3p  | 35,41 | rho-miR-223     | 35,02 |
| mmu-miR-154     | 35,45 | mmu-miR-24      | 35,17 |
| mmu-miR-23a     | 35,48 | mmu-miR-222     | 35,19 |
| mmu-miR-484     | 35,63 | mmu-miR-409-3p  | 35,29 |
| mmu-miR-27a     | 35,65 | mmu-miR-484     | 35,29 |
| mmu-miR-127     | 35,67 | mmu-miR-466d-5p | 35,31 |
| mmu-miR-21      | 35,71 | mmu-miR-150     | 35,36 |
| mmu-miR-486     | 35,72 | mmu-miR-191     | 35,45 |
| mmu-miR-181a    | 35,73 | mmu-let-7a-1*   | 35,52 |
| mmu-miR-92b     | 35,78 | mmu-miR-683     | 35,59 |
| mmu-miR-206     | 35,81 | mmu-miR-877     | 35,60 |
| mmu-miR-301a    | 35,98 | rho-miR-290     | 35,65 |
|                 |       | mmu-let-7i      | 35,77 |
|                 |       | mmu-miR-149     | 35,81 |
|                 |       | mmu-miR-101b    | 35,83 |
|                 |       | mmu-miR-324-5p  | 35,83 |
|                 |       | mmu-miR-466d-5p | 35,84 |
|                 |       | mmu-miR-214     | 35,85 |
|                 |       | mmu-miR-541     | 35,86 |
|                 |       | mmu-miR-412-3p  | 35,86 |
|                 |       | mmu-miR-20a     | 35,87 |
|                 |       | mmu-miR-218     | 35,97 |
|                 |       | mmu-miR-145     | 35,97 |
