# Supplementary material for: Extracellular Vesicle-Mediated Transfer of Genetic Information between the Hematopoietic System and the Brain in Response to Inflammation
Source: PubMed Central journal article supplement (PMC4043485; doi:10.1371/journal.pbio.1001874), 2014-06-03
Supplement: pbio.1001874.s008.pdf [file pbio.1001874.s008.pdf]

**Table S4 miRNAs Cp<36 in serum exosomes**

| Exiqon          | Cp peritonitis | Exiqon          | Cp control |
|-----------------|----------------|-----------------|------------|
| mmu-miR-451     | 24,28          | mmu-miR-451     | 24,8       |
| mmu-miR-144     | 25,74          | mmu-miR-144     | 26,23      |
| mmu-miR-142-3p  | 26,60          | mmu-miR-142-3p  | 27,7       |
| mmu-miR-16      | 27,36          | mmu-miR-16      | 27,8       |
| mmu-miR-21      | 27,39          | mmu-miR-21      | 28,09      |
| mmu-miR-223     | 28,48          | mmu-miR-19b     | 29,16      |
| mmu-miR-20a     | 28,95          | mmu-miR-93      | 29,27      |
| rno-miR-223     | 29,01          | mmu-miR-223     | 29,29      |
| mmu-miR-93      | 29,01          | mmu-miR-486     | 29,31      |
| mmu-miR-19b     | 29,01          | mmu-miR-20a     | 29,34      |
| mmu-miR-15b     | 29,05          | mmu-miR-669b    | 29,41      |
| mmu-miR-486     | 29,07          | mmu-miR-15b     | 29,48      |
| mmu-miR-126-3p  | 29,13          | mmu-miR-26a     | 29,48      |
| mmu-miR-150     | 29,16          | mmu-miR-126-3p  | 29,67      |
| mmu-miR-30c     | 29,20          | mmu-miR-24      | 29,67      |
| mmu-miR-23a     | 29,32          | mmu-miR-23a     | 29,79      |
| mmu-miR-15a     | 29,33          | mmu-miR-15a     | 29,8       |
| mmu-miR-26a     | 29,46          | mmu-miR-30c     | 29,83      |
| mmu-miR-24      | 29,57          | rno-miR-223     | 29,9       |
| mmu-let-7g      | 29,82          | mmu-let-7g      | 29,96      |
| mmu-miR-142-5p  | 29,99          | mmu-miR-30b     | 30,19      |
| mmu-miR-103     | 30,05          | mmu-miR-103     | 30,25      |
| mmu-miR-30b     | 30,10          | mmu-let-7b      | 30,49      |
| mmu-miR-191     | 30,24          | mmu-miR-150     | 30,78      |
| mmu-let-7i      | 30,45          | mmu-miR-142-5p  | 30,9       |
| mmu-miR-29a     | 30,51          | mmu-miR-191     | 31,05      |
| mmu-miR-222     | 30,65          | mmu-miR-582-3p  | 31,05      |
| mmu-let-7b      | 30,67          | mmu-let-7i      | 31,18      |
| mmu-miR-582-3p  | 30,81          | mmu-miR-29a     | 31,27      |
| mmu-let-7d      | 31,06          | mmu-let-7d      | 31,35      |
| mmu-miR-25      | 31,07          | mmu-miR-27a     | 31,37      |
| mmu-miR-27a     | 31,15          | mmu-miR-23b     | 31,38      |
| rno-miR-214     | 31,19          | rno-miR-214     | 31,67      |
| mmu-miR-328     | 31,25          | mmu-miR-25      | 31,69      |
| mmu-miR-23b     | 31,34          | mmu-miR-328     | 31,72      |
| mmu-miR-29c     | 31,40          | mmu-miR-222     | 31,76      |
| mmu-miR-320     | 31,44          | mmu-miR-29c     | 31,8       |
| mmu-miR-130a    | 31,47          | mmu-miR-107     | 31,81      |
| mmu-miR-128     | 31,51          | mmu-let-7a      | 31,92      |
| mmu-miR-760-3p  | 31,54          | mmu-miR-31      | 31,93      |
| mmu-let-7a      | 31,54          | mmu-miR-320     | 31,96      |
| mmu-miR-107     | 31,56          | mmu-miR-128     | 31,97      |
| mmu-miR-484     | 31,59          | mmu-miR-101a    | 32,02      |
| mmu-miR-101b    | 31,62          | mmu-miR-125a-5p | 32,03      |
| mmu-let-7c      | 31,69          | mmu-miR-322     | 32,06      |
| mmu-miR-181a    | 31,82          | mmu-miR-125b-5p | 32,07      |
| mmu-miR-101a    | 31,84          | mmu-miR-181a    | 32,08      |
| mmu-miR-125b-5p | 31,91          | mmu-miR-99a     | 32,15      |
| mmu-miR-221     | 31,96          | mmu-miR-484     | 32,19      |
| mmu-miR-99a     | 31,97          | mmu-let-7c      | 32,25      |
| mmu-miR-151-5p  | 31,98          | mmu-miR-26b     | 32,43      |
| mmu-miR-27b     | 31,99          | rno-miR-143     | 32,46      |
| mmu-miR-322     | 32,03          | mmu-miR-221     | 32,55      |
| mmu-miR-342-3p  | 32,06          | mmu-miR-101b    | 32,63      |
| mmu-miR-425     | 32,23          | mmu-miR-130a    | 32,68      |
| mmu-miR-423-3p  | 32,30          | mmu-miR-27b     | 32,69      |
| mmu-miR-26b     | 32,33          | mmu-miR-574-3p  | 32,72      |
| mmu-miR-22      | 32,36          | mmu-miR-151-5p  | 32,74      |
| mmu-miR-29b     | 32,42          | mmu-miR-423-3p  | 32,74      |
| mmu-miR-32      | 32,47          | mmu-miR-342-3p  | 32,75      |
| mmu-miR-297a    | 32,50          | mmu-miR-350     | 32,76      |
| mmu-miR-350     | 32,53          | mmu-miR-503     | 32,85      |
| rno-miR-143     | 32,54          | mmu-miR-29b     | 32,87      |
| mmu-miR-106b    | 32,55          | mmu-miR-425     | 32,88      |
| mmu-miR-574-3p  | 32,68          | mmu-miR-22      | 32,92      |
| mmu-miR-186     | 32,78          | mmu-miR-106b    | 32,99      |
| mmu-miR-125a-5p | 32,82          | mmu-miR-1       | 33,2       |

|                 |       |                 |       |
|-----------------|-------|-----------------|-------|
| mmu-miR-351     | 32,99 | mmu-miR-297a    | 33,23 |
| mmu-miR-669b    | 32,99 | mmu-miR-652     | 33,33 |
| mmu-miR-17      | 33,02 | mmu-miR-760-3p  | 33,4  |
| mmu-miR-345-3p  | 33,03 | mmu-miR-185     | 33,42 |
| mmu-miR-185     | 33,09 | mmu-miR-351     | 33,43 |
| rno-miR-338     | 33,24 | mmu-miR-148b    | 33,43 |
| mmu-miR-147     | 33,27 | mmu-let-7e      | 33,46 |
| mmu-miR-106a    | 33,28 | mmu-miR-133b    | 33,48 |
| mmu-miR-652     | 33,28 | mmu-miR-301a    | 33,58 |
| mmu-miR-99b     | 33,35 | mmu-miR-186     | 33,66 |
| mmu-miR-758     | 33,36 | mmu-miR-345-3p  | 33,74 |
| mmu-miR-140     | 33,38 | mmu-miR-139-5p  | 33,75 |
| mmu-miR-148b    | 33,48 | mmu-miR-30a     | 33,76 |
| mmu-miR-1       | 33,48 | mmu-miR-19a     | 33,77 |
| mmu-miR-192     | 33,49 | mmu-miR-99b     | 33,82 |
| mmu-let-7f      | 33,49 | mmu-miR-196a    | 33,84 |
| mmu-miR-374     | 33,57 | mmu-miR-140     | 33,85 |
| mmu-miR-19a     | 33,65 | mmu-miR-423-5p  | 33,86 |
| mmu-miR-423-5p  | 33,69 | mmu-miR-17      | 34,02 |
| mmu-miR-503     | 33,69 | mmu-miR-490-3p  | 34,02 |
| mmu-miR-139-5p  | 33,71 | mmu-miR-497     | 34,04 |
| mmu-miR-378     | 33,78 | rno-miR-338     | 34,08 |
| mmu-miR-30a     | 33,78 | mmu-miR-374     | 34,08 |
| mmu-miR-30d     | 33,87 | mmu-let-7f      | 34,09 |
| mmu-miR-143     | 34,00 | mmu-miR-32      | 34,15 |
| mmu-miR-467a    | 34,01 | mmu-miR-378     | 34,16 |
| mmu-let-7e      | 34,03 | mmu-miR-152     | 34,16 |
| mmu-miR-301a    | 34,05 | mmu-miR-758     | 34,17 |
| mmu-miR-205     | 34,07 | mmu-miR-30e     | 34,18 |
| mmu-miR-181d    | 34,14 | mmu-miR-467a    | 34,2  |
| mmu-miR-133b    | 34,17 | mmu-miR-324-5p  | 34,35 |
| mmu-miR-199a-3p | 34,19 | mmu-miR-365     | 34,35 |
| mmu-miR-326     | 34,20 | mmu-miR-106a    | 34,36 |
| mmu-miR-33      | 34,21 | mmu-miR-495     | 34,36 |
| mmu-miR-148a    | 34,21 | mmu-miR-199a-5p | 34,42 |
| mmu-miR-210     | 34,26 | mmu-miR-370     | 34,45 |
| mmu-miR-134     | 34,27 | mmu-miR-326     | 34,47 |
| mmu-miR-199a-5p | 34,28 | mmu-miR-133a    | 34,47 |
| mmu-miR-181c    | 34,31 | mmu-miR-205     | 34,5  |
| mmu-miR-124     | 34,33 | mmu-miR-148a    | 34,51 |
| mmu-miR-151-3p  | 34,38 | mmu-miR-143     | 34,65 |
| mmu-miR-133a    | 34,38 | mmu-miR-297b-3p | 34,68 |
| rno-miR-381     | 34,39 | mmu-miR-181c    | 34,69 |
| mmu-miR-31      | 34,40 | mmu-miR-134     | 34,71 |
| mmu-miR-490-3p  | 34,45 | mmu-miR-9       | 34,74 |
| mmu-miR-421     | 34,46 | mmu-miR-466d-3p | 34,76 |
| mmu-miR-18a     | 34,46 | mmu-miR-200c    | 34,79 |
| mmu-miR-466d-3p | 34,49 | rno-miR-345-5p  | 34,8  |
| mmu-miR-296-5p  | 34,51 | mmu-miR-296-5p  | 34,81 |
| mmu-miR-30e     | 34,52 | mmu-miR-210     | 34,82 |
| mmu-miR-152     | 34,62 | rno-miR-200c    | 34,88 |
| mmu-miR-497     | 34,64 | mmu-miR-30d     | 34,89 |
| mmu-miR-195     | 34,69 | mmu-miR-195     | 34,94 |
| mmu-miR-200c    | 34,75 | mmu-miR-330     | 34,94 |
| mmu-miR-338-3p  | 34,77 | mmu-miR-409-3p  | 34,94 |
| mmu-miR-540-3p  | 34,84 | mmu-miR-122     | 34,95 |
| mmu-miR-450a    | 34,84 | mmu-miR-18a     | 35,13 |
| mmu-miR-297c    | 35,12 | mmu-miR-181d    | 35,25 |
| mmu-miR-466a-3p | 35,17 | mmu-miR-338-3p  | 35,25 |
| mmu-miR-219-5p  | 35,19 | mmu-miR-199a-3p | 35,33 |
| rno-miR-136     | 35,19 | mmu-miR-192     | 35,45 |
| mmu-miR-100     | 35,23 | mmu-miR-421     | 35,45 |
| mmu-miR-672     | 35,26 | mmu-miR-33      | 35,57 |
| mmu-miR-339-5p  | 35,27 | mmu-miR-151-3p  | 35,89 |
| mmu-miR-362-3p  | 35,27 |                 |       |
| mmu-miR-495     | 35,30 |                 |       |
| mmu-miR-874     | 35,35 |                 |       |
| mmu-miR-676     | 35,35 |                 |       |
| mmu-miR-28      | 35,37 |                 |       |
| mmu-miR-330     | 35,38 |                 |       |

|                 |       |
|-----------------|-------|
| mmu-miR-325     | 35,50 |
| mmu-miR-331-3p  | 35,50 |
| mmu-miR-362-5p  | 35,51 |
| mmu-miR-194     | 35,53 |
| mmu-miR-500     | 35,54 |
| mmu-miR-196a-2* | 35,55 |
| mmu-miR-345-5p  | 35,56 |
| mmu-miR-34a     | 35,66 |
| mmu-miR-132     | 35,67 |
| mmu-miR-146a    | 35,68 |
| mmu-miR-434-3p  | 35,70 |
| mmu-miR-181b    | 35,70 |
| mmu-miR-324-3p  | 35,70 |
| mmu-miR-145     | 35,72 |
| mmu-miR-297b-3p | 35,72 |
| mmu-miR-30c-2*  | 35,90 |
| mmu-miR-324-5p  | 35,92 |
| mmu-miR-139-3p  | 35,97 |
